# Supplementary material
Source: publisher figshare collection journal article supplement (https://acs.figshare.com/ndownloader/files/25178557)
Supplement: Supplementary file 1 [file 25178557]

## Supporting Information for:

# Understanding the Amorphous Lithiation Pathway of the Type I Ba<sub>8</sub>Ge<sub>43</sub> Clathrate with Synchrotron X- ray Characterization

*Andrew Dopilka<sup>1</sup>, Amanda Childs<sup>2</sup>, Svilen Bobev<sup>2</sup>, Candace K. Chan<sup>1,3\*</sup>*

1. Materials Science and Engineering, School for Engineering of Matter, Transport and Energy, Arizona State University, P.O. Box 876106, Tempe, AZ 85827
2. Department of Chemistry and Biochemistry, University of Delaware, Newark, DE 19716
3. Department of Heterogenous Catalysis, Max-Planck-Institut für Kohlenforschung, Kaiser-Wilhelm-Platz 1, 45470 Mülheim an der Ruhr, Germany

Corresponding author: \*candace.chan@asu.edu

# Table of Contents

## 1. Experimental Procedures

- 1.1 Synthesis of type I Ge clathrates
- 1.2 Electrochemical measurements
- 1.3 Sample preparation for synchrotron measurements
- 1.4 Pair distribution function (PDF) analysis
- 1.5 Powder X-ray diffraction
- 1.6 Scanning electron microscopy

## 2. Supporting Tables

- Table S1.** The measured voltages and capacity for each sample after electrochemical lithiation
- Table S2.** Rietveld refinement parameters for  $\text{Li}_{1.75}\text{Ge}$
- Table S3.** Rietveld refinement parameters for  $\text{Li}_{3.75}\text{Ge}$
- Table S4.** PDFgui refinement parameters for pristine  $\alpha\text{-Ge}$  and  $\text{Li}_{1.75}\text{Ge}$  sample fit to different phase combinations
- Table S5.** PDFgui refinement parameters for  $\text{Li}_{2.75}\text{Ge}$  sample fit to different phase combinations
- Table S6.** PDFgui refinement parameters for  $\text{Li}_{3.75}\text{Ge}$  sample fit to different phase combinations
- Table S7.** PDFgui refinement parameters for pristine  $\text{Ba}_8\text{Ge}_{43}$  and  $\text{Li}_{1.75}\text{Ba}_{0.19}\text{Ge}$
- Table S8.** PDFgui refinement parameters for pristine  $\text{Ba}_8\text{Al}_{16}\text{Ge}_{30}$  and  $\text{Li}_{1.9}\text{Ba}_{0.17}\text{Al}_{0.35}\text{Ge}_{0.65}$
- Table S9.** PDFgui refinement parameters for PDFs of  $\text{Li}_{2.75}\text{Ba}_{0.19}\text{Ge}$  and  $\text{Li}_{3.75}\text{Ba}_{0.19}\text{Ge}$  after heating

## 3. Supporting Figures

- Figure S1.** SEM images of  $\text{Ba}_8\text{Ge}_{43}$  and  $\alpha\text{-Ge}$  electrode prior to electrochemical cycling
- Figure S2.** Rietveld refinements of the XRD patterns of  $\text{Li}_{1.75}\text{Ge}$  and  $\text{Li}_{3.75}\text{Ge}$
- Figure S3.** PDF Refinements of the  $\alpha\text{-Ge}$  PDF before and after lithiation
- Figure S4.** Calculated total and partial PDF patterns for  $\text{Ba}_8\text{Ge}_{43}$ ,  $\text{Li}_5\text{Ge}_2$ ,  $\text{Li}_7\text{Ge}_2$ ,  $\text{Li}_7\text{Ge}_3$ ,  $\text{Li}_9\text{Ge}_4$ , and  $\text{Li}_{15}\text{Ge}_4$
- Figure S5.** Crystal structures of  $\text{Li}_7\text{Ge}_3$ ,  $\text{Li}_5\text{Ge}_2$ ,  $\text{Li}_9\text{Ge}_4$ ,  $\text{Li}_7\text{Ge}_2$ ,  $\text{Li}_{15}\text{Ge}_4$ , and  $\text{Ba}_2\text{LiGe}_3$
- Figure S6.** PDF refinements for  $\text{Ba}_8\text{Ge}_{43}$  before and after lithiation
- Figure S7.** Electrochemical data and PDFs of  $\text{Ba}_8\text{Ge}_{43}$  and  $\alpha\text{-Ge}$  after one full cycle
- Figure S8.** Electrochemical data and PDFs of  $\text{Ba}_8\text{Al}_{16}\text{Ge}_{30}$  before and after lithiation
- Figure S9.** Comparison of total scattering structure function for  $\text{Li}_{2.75}\text{Ba}_{0.19}\text{Ge}$  and  $\text{Li}_{3.75}\text{Ba}_{0.19}\text{Ge}$  after lithiation and heating with that for  $\text{Li}_{2.75}\text{Ge}$  and  $\text{Li}_{3.75}\text{Ge}$
- Figure S10.** Assignment of Ge-Ge correlation distances found in the PDF to distances between Ge atoms for  $\text{Li}_7\text{Ge}_3$ ,  $\text{Li}_7\text{Ge}_2$ , and  $\text{Li}_{15}\text{Ge}_4$
- Figure S11.** PDF refinements of  $\text{Li}_{2.75}\text{Ba}_{0.19}\text{Ge}$  and  $\text{Li}_{3.75}\text{Ba}_{0.19}\text{Ge}$  after heating to 450 and 420 K, respectively
- Figure S12.** Variable temperature PDF during *in situ* heating from 310 – 420 K of  $\text{Li}_{3.75}\text{Ge}$
- Figure S13.** Rietveld refinements of the XRD patterns for  $\text{Li}_{3.75}\text{Ba}_{0.19}\text{Ge}$  heated from 360 – 480 K and the lattice parameter of  $\text{Li}_{15}\text{Ge}_4$  vs. temperature
- Figure S14.** XRD patterns of  $\text{Li}_{3.75}\text{Ba}_{0.19}\text{Ge}$  and  $\text{Li}_{3.75}\text{Ge}$  after heating to 480 K and phase identification
- Figure S15.** Comparison of *ex situ* lab powder XRD pattern of  $\text{Li}_{3.75}\text{Ba}_{0.19}\text{Ge}$  after heating in a Ta vs. glass capillary

## Experimental Procedures

### 1.1. Synthesis of type I Ge clathrates

The synthesis of  $\text{Ba}_8\text{Ge}_{43}$  and  $\text{Ba}_8\text{Al}_{16}\text{Ge}_{30}$  was prepared in a similar manner as described in our previous work.<sup>1</sup> Metals of Ba, and Al and Ge (commercial grade materials with stated purity 99.9% wt) were weighed in an Ar-filled glove box (controlled  $\text{O}_2$  and moisture atmosphere). An extra amount (5%) of Ba was loaded since Ba is more volatile than other elements. The total weight of the starting materials was ca. 600 mg. Then, the materials were quickly transferred to the chamber of a custom-made arc-melter, which was evacuated to ca.  $10^{-4}$  Torr and backfilled with high purity argon. After the initial melting, the formed ingot was taken out and turned over. The melting process was repeated three times to ensure good homogeneity. The ingot was hand ground in a mortar and pestle prior to electrochemical testing.

### 1.2. Electrochemical measurements

The clathrate powder was prepared into slurries by mixing the clathrate sample with 10 wt% carbon black (to serve as conducting additive) and 10 wt% polyvinylidene difluoride (PVDF) (to serve as binder) in N-methyl pyrrolidone (NMP) as solvent. Hand ground 100 mesh Ge powder (Sigma Aldrich 99.999%) was used to prepare electrodes for comparison to the clathrate samples. The slurries were stirred overnight and coated onto Cu foil current collectors using a Meyer rod, and then heated at 120 °C to remove the solvent. Electrodes were cut into circles 18 mm in diameter and typically had an area mass loading of 4-4.5 mg/cm<sup>2</sup>. The clathrate composite electrodes were evaluated in pouch cells with Li metal as the counter electrode, Celgard 2500 as separator, and 1 M  $\text{LiPF}_6$  in ethylene carbonate and ethyl methyl carbonate (3: 7 by vol) (LBC3015B, MTI) as electrolyte. Electrochemical testing was performed using a Biologic VMP3 galvanostat/potentiostat. Galvanostatic measurements were performed at 25 mA/g from 0.01 – 2.5 V vs.  $\text{Li/Li}^+$ . After the cell was lithiated to the desired composition, it was allowed to relax at open circuit for 5 hours prior to disassembly. To provide sufficient lithiated powder for

structural characterization, samples from 2-3 cells prepared and electrochemically lithiated in the same manner were combined.

### 1.3. Sample preparation for synchrotron measurements

After the electrochemical lithiation was complete, the pouch cell was taken into the argon-filled glovebox and opened. The electrode was then immersed in 10 mL of dimethyl carbonate for 30 seconds to wash off any excess battery electrolyte. After the electrode was dry, the lithiated powder was scraped off of the copper current collector using a knife. The extracted powder was then crushed in a mortar and pestle to break up any agglomeration. The powder was sealed in a 2 mL centrifuge tube and then sealed under argon in a polyfoil bag before shipping to the synchrotron facility.

### 1.4. Pair distribution function (PDF) analysis

Lithiated powders were loaded into 0.8 mm diameter borosilicate capillaries and sealed with wax and superglue inside an argon-filled glovebox, while pristine powders were loaded into the capillaries in ambient conditions. PDF measurements were performed at the Diamond Light Source (Didcot, United Kingdom) at the I15-I dedicated PDF beamline with 76 keV X-rays (wavelength of 0.161669 Å) and 2D PerkinElmer image plate detectors. The detector geometry allowed collection of total scattering data to  $Q = 30 \text{ Å}^{-1}$ . *Ex situ* PDF measurements were carried out at room temperature. The *in situ* PDF heating measurements were carried out from 300 – 450 K (temperature interval of 10 K) using an Oxford Instruments Cryojet 5. After reaching each hold temperature, there was a 1.5 min equilibration period and then the scattering data were collected with a 10 minute collection time. For the  $\text{Li}_{3.75}\text{Ge}$  heating experiments, a 5 minute collection time was used due to time constraints.

PDFs were generated from the total scattering data using PDFgetX3<sup>2</sup> within the xPDFsuite software package,<sup>3</sup> wherein the measured total scattering intensities,  $I(Q)$ , are corrected to obtain the coherent scattering,  $I_c(Q)$  and transformed into the structure function,  $S(Q)$ , according to equation 1,<sup>2</sup>

$$S(Q) = \frac{I_c(Q) - \langle f(Q)^2 \rangle + \langle f(Q) \rangle^2}{\langle f(Q) \rangle^2} \quad (1)$$

where  $f(Q)$  is the atomic scattering factor, which is averaged over all atom types in the sample. The PDF,  $G(r)$ , is obtained from the Fourier transform of  $S(Q)$  as shown in equation 2:

$$G(r) = \frac{2}{\pi} \int_{Q_{min}}^{Q_{max}} Q [S(Q) - 1] \sin(Qr) dQ \quad (2)$$

To generate the PDFs, the following parameters were used:  $Q_{min} = 0.5 \text{ \AA}^{-1}$ ,  $Q_{max} = 25 \text{ \AA}^{-1}$ ,  $r_{step} = 0.1 \text{ \AA}$ , and  $r_{poly} = 0.9$ . The nominal composition for lithiated samples was obtained from the charge passed during the electrochemical measurements.

PDF refinements were carried out using PDFgui<sup>4</sup>. No attempts were made to consider the presence of binder, carbon black, or SEI components in the samples. Previous reports have shown that these components add negligible contribution to the PDF data.<sup>5</sup> PDF refinements were performed using  $Q_{damp} = 0.0247$  and  $Q_{broad} = 0.0151$  (obtained from refinement of a NIST Si standard). To refine a PDF pattern, the major phase of the pattern was first selected and then the scale factor and lattice parameter were refined. Then, the atomic displacement parameters (ADP) for each element (initially set to  $0.03 \text{ \AA}^2$ ) and the linear atomic scale factor ( $\delta l$ ) were allowed to be refined. If this resulted in an insufficient fit, possible secondary phases were added and refined in a similar way. In some cases, the Li ADP refined to very large values ( $0.5 - 1 \text{ \AA}^2$ ). If this occurred, the Li ADP was fixed to a lower value. Unphysical ADPs for Li have been reported previously and is an indication of disorder/partial occupancy or atomic substitution<sup>6</sup>.

The refinements were conducted using the following structures for the fittings:  $\text{Ba}_8\text{Ge}_{43}$  ( $Pm\bar{3}m$ , ICSD-97480)<sup>7</sup>,  $\alpha\text{-Ge}$  ( $Fd\bar{3}m$ , ICSD-44841)<sup>8</sup>,  $\text{Li}_9\text{Ge}_4$  ( $Cmcm$ , ICSD-25308)<sup>9</sup>,  $\text{Li}_7\text{Ge}_2$  ( $Cmmm$ , ICSD-42063)<sup>10</sup>,  $\text{Li}_{15}\text{Ge}_4$  ( $I\bar{4}3d$ , ICSD-43235)<sup>11</sup>, and  $\text{Li}_7\text{Ge}_3$  ( $P3_212$ ),  $\text{Li}_5\text{Ge}_2$  ( $R\bar{3}m$ ), and  $\text{Li}_{13}\text{Ge}_5$  ( $P\bar{3}m1$ ) (predicted from first principles calculations by Morris et. al<sup>12</sup>).

### 1.5. Powder X-ray diffraction (XRD)

Synchrotron XRD was performed at the P02.1 Powder Diffraction and Total Scattering Beamline at PETRA III at the Deutsches Elektronen-Synchrotron (DESY) with 60 keV X-rays at a wavelength of 0.20733 Å. A Perkin Elmer XRD1621 was used as the X-ray detector. The lithiated samples were loaded into 0.8 mm borosilicate capillaries in an argon-filled glovebox and sealed with wax. *In situ* heating experiments were conducted in borosilicate capillaries and heated with an Oxford Cryostream cooler. For the *in situ* measurements, 3 scans were taken every 2 minutes with a total hold time of 6 minutes at the temperature. A temperature interval of 20 K was used starting at 300 K and going to 480 K.

Rietveld refinement of the XRD patterns was performed with Jana2006<sup>13</sup>. The peak shapes were described by the pseudo-Voigt function, background fit with Legendre polynomials, and atomic displacement parameters (ADP) were modeled as isotropic. In some cases, the Li ADP refined to very large values ( $0.5 - 1 \text{ Å}^2$ ). If this occurred, the Li ADP was fixed to a lower value. Unphysical ADP for Li have been reported previously and is an indication of disorder/partial occupancy or atomic substitution<sup>6</sup>.

Laboratory powder X-ray diffraction was performed with a Bruker D8 diffractometer with Cu X-rays operated at 40 kV and 40 mA with standard Bragg-Brentano diffraction geometry. For air-sensitive samples, the sample was covered with a Kapton film in an argon-filled glovebox prior to diffraction measurements. The Kapton film resulted in a broad amorphous background from  $15 < 2\theta < 25$ .

Obtained XRD patterns were compared to the same reference patterns indicated in the previous section, as well as the following: LiGe ( $I4_1/a$ , ICSD-42062)<sup>14</sup>, Ba<sub>2</sub>LiGe<sub>3</sub> ( $Fddd$ , ICSD-404705)<sup>15</sup>, Li<sub>4</sub>Ge<sub>1</sub> ( $Cmcm$ , ICSD-427231)<sup>16</sup>, Li<sub>17</sub>Ge<sub>4</sub> ( $F\bar{4}3m$ , ICSD-427232)<sup>16</sup>.

### 1.6. Scanning electron microscopy

Scanning electron microscopy (SEM) imaging was performed using an XL30 ESEM-FEG microscope and a 20 kV electron beam. The electrodes were cut from copper foil and mounted on SEM stubs with carbon tape

## Supporting Tables

**Table S1.** The measured voltages and corresponding capacity for each sample after electrochemical lithiation to different Li/Ge ratios.

| Electrode                            | # of Li inserted per Ge atom | Voltage (V vs. Li/Li <sup>+</sup> ) | Capacity (mAh/g) |
|--------------------------------------|------------------------------|-------------------------------------|------------------|
| <b>Ba<sub>8</sub>Ge<sub>43</sub></b> | 1.75                         | 0.175                               | 478              |
|                                      | 2.75                         | 0.11                                | 752              |
|                                      | 3.75                         | 0.01                                | 1025             |
| <b><math>\alpha</math>-Ge</b>        | 1.75                         | 0.28                                | 647              |
|                                      | 2.75                         | 0.17                                | 1017             |
|                                      | 3.75                         | 0.01                                | 1386             |

**Table S2.** Refined atomic positions, lattice parameters, and atomic displacement parameters for the Li<sub>1.75</sub>Ge sample. The refinement plot can be found in Figure S2a.

| <b>Ge</b>                           | <b><math>Fd\bar{3}m</math></b> | <b>Lattice Parameter: 5.65735(8) Å</b>                        |     |             |      |                                    |
|-------------------------------------|--------------------------------|---------------------------------------------------------------|-----|-------------|------|------------------------------------|
| Atom                                | Site                           | x/a                                                           | y/b | z/c         | Occ. | U <sub>iso</sub> (Å <sup>2</sup> ) |
| Ge1                                 | 8b                             | 0                                                             | 0   | 0           | 1    | 0.0071(3)                          |
| <b>Li<sub>5</sub>Ge<sub>2</sub></b> | <b><math>R\bar{3}m</math></b>  | <b>Lattice Parameter: a = 4.46774(18) Å c = 18.3973(14) Å</b> |     |             |      |                                    |
| Atom                                | Site                           | x/a                                                           | y/b | z/c         | Occ. | U <sub>iso</sub> (Å <sup>2</sup> ) |
| Li1                                 | 3a                             | 0                                                             | 0   | 1/2         | 1    | 0.05*                              |
| Li2                                 | 6c                             | 0                                                             | 0   | 0.350712    | 1    | 0.05*                              |
| Li3                                 | 6c                             | 0                                                             | 0   | 0.191734    | 1    | 0.05*                              |
| Ge1                                 | 6c                             | 0                                                             | 0   | 0.06795(11) | 1    | 0.0112(7)                          |

\*The atomic displacement parameters for Li were fixed to 0.05 due to refining to unphysical values.

**Table S3.** Refined atomic positions, lattice parameters, and atomic displacement parameters for the  $\text{Li}_{3.75}\text{Ge}$  sample. The refinement plot can be found in Figure S2b.

| $\text{Li}_{15}\text{Ge}_4$ | $\bar{I}43d$ | Lattice Parameter: 10.7763(4) Å |            |            |      |                                 |
|-----------------------------|--------------|---------------------------------|------------|------------|------|---------------------------------|
| Atom                        | Site         | x/a                             | y/b        | z/c        | Occ. | $U_{\text{iso}} (\text{\AA}^2)$ |
| Li1                         | 48e          | 0.0349(17)                      | 0.3727(13) | 0.1515(13) | 1    | 0.008(4)                        |
| Li2                         | 12a          | 3/8                             | 0          | 1/4        | 1    | 0.03*                           |
| Ge1                         | 16c          | 0.20975(10)                     | x          | x          | 1    | 0.0168(6)                       |

\*The atomic displacement parameters for Li were fixed to 0.03 due to refining to unphysical values.

**Table S4.** PDFgui refinement parameters for pristine  $\alpha$ -Ge and the  $\text{Li}_{1.75}\text{Ge}$  sample fit to different phase combinations. Refinement plots for the pristine  $\alpha$ -Ge sample and the  $\text{Li}_{1.75}\text{Ge}$  sample refined to the structure of  $\alpha$ -Ge and  $\text{Li}_5\text{Ge}_2$  are presented in Figure S3ab.

|                        | Pristine $\alpha$ -Ge | $\text{Li}_{1.75}\text{Ge}$ |                                      | $\text{Li}_{1.75}\text{Ge}$ |                                         | $\text{Li}_{1.75}\text{Ge}$ |                                      |
|------------------------|-----------------------|-----------------------------|--------------------------------------|-----------------------------|-----------------------------------------|-----------------------------|--------------------------------------|
| Phase                  | Ge<br>$Fd\bar{3}m$    | Ge<br>$Fd\bar{3}m$          | $\text{Li}_7\text{Ge}_3$<br>$P3_212$ | Ge<br>$Fd\bar{3}m$          | $\text{Li}_5\text{Ge}_2$<br>$R\bar{3}m$ | Ge<br>$Fd\bar{3}m$          | $\text{Li}_9\text{Ge}_4$<br>$Cmcm$   |
| Mol Fraction           | 1                     | 0.096                       | 0.904                                | 0.094                       | 0.906                                   | 0.093                       | 0.907                                |
| Lattice Parameters (Å) | a = 5.655             | a = 5.652                   | a = 7.723<br>c = 18.470              | a = 5.652                   | a = 4.464<br>c = 18.435                 | a = 5.649                   | a = 4.453<br>b = 7.700<br>c = 24.808 |
| Delta 1                | 1.937                 | 1.724                       | 2.397                                | 2.444                       | 1.045                                   | 1.748                       | 2.419                                |
| ADP*                   | 0.008                 | Ge: 0.011                   | Li: 0.204<br>Ge: 0.022               | Ge: 0.011                   | Li: 0.280<br>Ge: 0.027                  | Ge: 0.0086                  | Li: 0.129<br>Ge: 0.031               |
| $R_w$                  | 0.082                 | 0.197                       |                                      | 0.191                       |                                         | 0.229                       |                                      |

\*Atomic displacement parameters ( $U_{11} = U_{22} = U_{33}$ , Å<sup>2</sup>)



**Table S5.** PDFgui refinement parameters for Li<sub>2.75</sub>Ge sample fit to different phase combinations. Plot of the sample refined with Li<sub>13</sub>Ge<sub>5</sub> and Li<sub>7</sub>Ge<sub>2</sub> is presented in Figure S3c.

|                               | <b>Li<sub>2.75</sub>Ge</b>                                        |                                                | <b>Li<sub>2.75</sub>Ge</b>                                    | <b>Li<sub>2.75</sub>Ge</b>                                     |
|-------------------------------|-------------------------------------------------------------------|------------------------------------------------|---------------------------------------------------------------|----------------------------------------------------------------|
| <b>Phase</b>                  | Li <sub>13</sub> Ge <sub>5</sub><br><i>P</i> $\bar{3}$ <i>m</i> 1 | Li <sub>7</sub> Ge <sub>2</sub><br><i>Cmmm</i> | Li <sub>7</sub> Ge <sub>3</sub><br><i>P</i> 3 <sub>2</sub> 12 | Li <sub>5</sub> Ge <sub>2</sub><br><i>R</i> $\bar{3}$ <i>m</i> |
| <b>Mol Fraction</b>           | 0.643                                                             | 0.357                                          | 1                                                             | 1                                                              |
| <b>Lattice Parameters (Å)</b> | a = 4.452<br>c = 16.122                                           | a = 9.106<br>b = 13.233<br>c = 4.532           | a = 7.735<br>c = 18.678                                       | a = 4.470<br>c = 18.645                                        |
| <b>Delta 1</b>                | 1.977                                                             | 1.856                                          | 2.334                                                         | 2.334                                                          |
| <b>ADP*</b>                   | Li: 0.086<br>Ge: 0.016                                            | Li: 0.03**<br>Ge: 0.018                        | Li: 0.062<br>Ge: 0.021                                        | Li: 0.083<br>Ge: 0.023                                         |
| <b>R<sub>w</sub></b>          | 0.195                                                             |                                                | 0.255                                                         | 0.268                                                          |

\*Atomic displacement parameters ( $U_{11}= U_{22}= U_{33}$ , Å<sup>2</sup>)

\*\* Note: Refinement of the ADPs for Li in the Li<sub>7</sub>Ge<sub>2</sub> phase resulted in unreasonably high values so it was fixed at 0.03.

**Table S6.** PDFgui refinement parameters for Li<sub>3.75</sub>Ge sample fit to different phase combinations. Plot of the sample refined with Li<sub>15</sub>Ge<sub>4</sub> and Li<sub>7</sub>Ge<sub>3</sub> is presented in Figure S3d.

|                               | <b>Li<sub>3.75</sub>Ge</b>                                        | <b>Li<sub>3.75</sub>Ge</b>                                        |                                                               | <b>Li<sub>3.75</sub>Ge</b>                                        |                                                                |
|-------------------------------|-------------------------------------------------------------------|-------------------------------------------------------------------|---------------------------------------------------------------|-------------------------------------------------------------------|----------------------------------------------------------------|
| <b>Phase</b>                  | Li <sub>15</sub> Ge <sub>4</sub><br><i>I</i> $\bar{4}$ 3 <i>d</i> | Li <sub>15</sub> Ge <sub>4</sub><br><i>I</i> $\bar{4}$ 3 <i>d</i> | Li <sub>7</sub> Ge <sub>3</sub><br><i>P</i> 3 <sub>2</sub> 12 | Li <sub>15</sub> Ge <sub>4</sub><br><i>I</i> $\bar{4}$ 3 <i>d</i> | Li <sub>5</sub> Ge <sub>2</sub><br><i>R</i> $\bar{3}$ <i>m</i> |
| <b>Mol Fraction</b>           | 1                                                                 | 0.857                                                             | 0.143                                                         | 0.862                                                             | 0.138                                                          |
| <b>Lattice Parameters (Å)</b> | a = 10.784                                                        | a = 10.763                                                        | a = 7.728<br>c = 18.814                                       | a = 10.763                                                        | a = 4.471<br>c = 18.751                                        |
| <b>Delta 1</b>                | 0.763                                                             | 1.724                                                             | 1.929                                                         | 1.799                                                             | 1.045                                                          |
| <b>ADP*</b>                   | Li: 0.064<br>Ge: 0.016                                            | Li: 0.105<br>Ge: 0.013                                            | Li: 0.045<br>Ge: 0.015                                        | Li: 0.107<br>Ge: 0.013                                            | Li: 0.044<br>Ge: 0.016                                         |
| <b>R<sub>w</sub></b>          | 0.229                                                             | 0.118                                                             |                                                               | 0.127                                                             |                                                                |

\*Atomic displacement parameters ( $U_{11}= U_{22}= U_{33}$ , Å<sup>2</sup>)

**Table S7.** PDFgui refinement parameters for the pristine Ba<sub>8</sub>Ge<sub>43</sub> and Li<sub>1.75</sub>Ba<sub>0.19</sub>Ge PDF plots in Figure S6.

|                              | <b>Pristine Ba<sub>8</sub>Ge<sub>43</sub></b>                    |                                    | <b>Li<sub>1.75</sub>Ba<sub>0.19</sub>Ge</b>                      | <b>Li<sub>1.75</sub>Ba<sub>0.19</sub>Ge<br/>(10 &lt; r &lt; 30 Å)</b> |
|------------------------------|------------------------------------------------------------------|------------------------------------|------------------------------------------------------------------|-----------------------------------------------------------------------|
| <b>Phase</b>                 | Ba <sub>8</sub> Ge <sub>43</sub><br><i>Pm</i> $\bar{3}$ <i>n</i> | Ge<br><i>Fd</i> $\bar{3}$ <i>m</i> | Ba <sub>8</sub> Ge <sub>43</sub><br><i>Pm</i> $\bar{3}$ <i>n</i> | Ba <sub>8</sub> Ge <sub>43</sub><br><i>Pm</i> $\bar{3}$ <i>n</i>      |
| <b>Mol Fraction</b>          | 0.956                                                            | 0.044                              | 1                                                                | 1                                                                     |
| <b>Lattice Parameter (Å)</b> | a = 10.658                                                       | a = 5.652                          | a = 10.652                                                       | a = 10.646                                                            |
| <b>Delta 1</b>               | 2.285                                                            | n/a                                | 2.432                                                            | 2.432                                                                 |
| <b>ADP*</b>                  | Ba: 0.050<br>Ge: 0.027                                           | Ge: 0.007                          | Ba: 0.027<br>Ge: 0.025                                           | Ba: 0.022<br>Ge: 0.022                                                |
| <b>R<sub>w</sub></b>         | 0.130                                                            |                                    | 0.587                                                            | 0.290                                                                 |

\*Atomic displacement parameters ( $U_{11}= U_{22}= U_{33}$ , Å<sup>2</sup>)

**Table S8.** PDFgui refinement parameters for pristine Ba<sub>8</sub>Al<sub>16</sub>Ge<sub>30</sub> and Li<sub>1.9</sub>Ba<sub>0.17</sub>Al<sub>0.35</sub>Ge<sub>0.65</sub> PDF plots in Figure S8bc.

|                              | <b>Pristine Ba<sub>8</sub>Al<sub>16</sub>Ge<sub>30</sub></b>                      | <b>Li<sub>1.9</sub>Ba<sub>0.17</sub>Al<sub>0.35</sub>Ge<sub>0.65</sub></b>        |
|------------------------------|-----------------------------------------------------------------------------------|-----------------------------------------------------------------------------------|
| <b>Phase</b>                 | Ba <sub>8</sub> Al <sub>16</sub> Ge <sub>30</sub><br><i>Pm</i> $\bar{3}$ <i>n</i> | Ba <sub>8</sub> Al <sub>16</sub> Ge <sub>30</sub><br><i>Pm</i> $\bar{3}$ <i>n</i> |
| <b>Mol Fraction</b>          | 1                                                                                 | 1                                                                                 |
| <b>Lattice Parameter (Å)</b> | a = 10.854                                                                        | a = 10.836                                                                        |
| <b>Delta 1</b>               | 1.489                                                                             | 2.0                                                                               |
| <b>ADP*</b>                  | Ba: 0.05<br>Ge/Al: 0.014                                                          | Ba: 0.023<br>Ge/Al: 0.01                                                          |
| <b>R<sub>w</sub></b>         | 0.095                                                                             | 0.674                                                                             |

\*Atomic displacement parameters ( $U_{11}= U_{22}= U_{33}$ , Å<sup>2</sup>)

**Table S9.** PDFgui refinement parameters for PDFs of  $\text{Li}_{2.75}\text{Ba}_{0.19}\text{Ge}$  and  $\text{Li}_{3.75}\text{Ba}_{0.19}\text{Ge}$  after heating to 450 K and 420 K, respectively. Plots of these refinements can be found in Figure S11.

|                                                     | <b><math>\text{Li}_{2.75}\text{Ba}_{0.19}\text{Ge}</math></b> | <b><math>\text{Li}_{2.75}\text{Ba}_{0.19}\text{Ge}</math><br/>(<math>6 &lt; r &lt; 30 \text{ \AA}</math>)</b> | <b><math>\text{Li}_{3.75}\text{Ba}_{0.19}\text{Ge}</math></b> |
|-----------------------------------------------------|---------------------------------------------------------------|---------------------------------------------------------------------------------------------------------------|---------------------------------------------------------------|
| <b>Phase</b>                                        | $\text{Li}_7\text{Ge}_2$<br><i>Cmmm</i>                       | $\text{Li}_7\text{Ge}_2$<br><i>Cmmm</i>                                                                       | $\text{Li}_{15}\text{Ge}_4$<br>$\bar{1}43d$                   |
| <b>Mol Fraction</b>                                 | 1                                                             | 1                                                                                                             | 1                                                             |
| <b>Lattice Parameters (<math>\text{\AA}</math>)</b> | a = 9.315<br>b = 13.154<br>c = 4.561                          | a = 9.317<br>b = 13.174<br>c = 4.55                                                                           | a = 10.826                                                    |
| <b>Delta 1</b>                                      | 2.569                                                         | 2.569                                                                                                         | 1.040                                                         |
| <b>ADP*</b>                                         | Li: 0.1**<br>Ge: 0.027                                        | Li: 0.1**<br>Ge: 0.025                                                                                        | Li: 0.1**<br>Ge: 0.018                                        |
| <b><math>R_w</math></b>                             | 0.550                                                         | 0.286                                                                                                         | 0.389                                                         |

\*Atomic displacement parameters ( $U_{11} = U_{22} = U_{33}$ ,  $\text{\AA}^2$ )

\*Refinement of the ADP for Li in both cases resulted in unreasonably high values so it was fixed.

## Supporting Figures

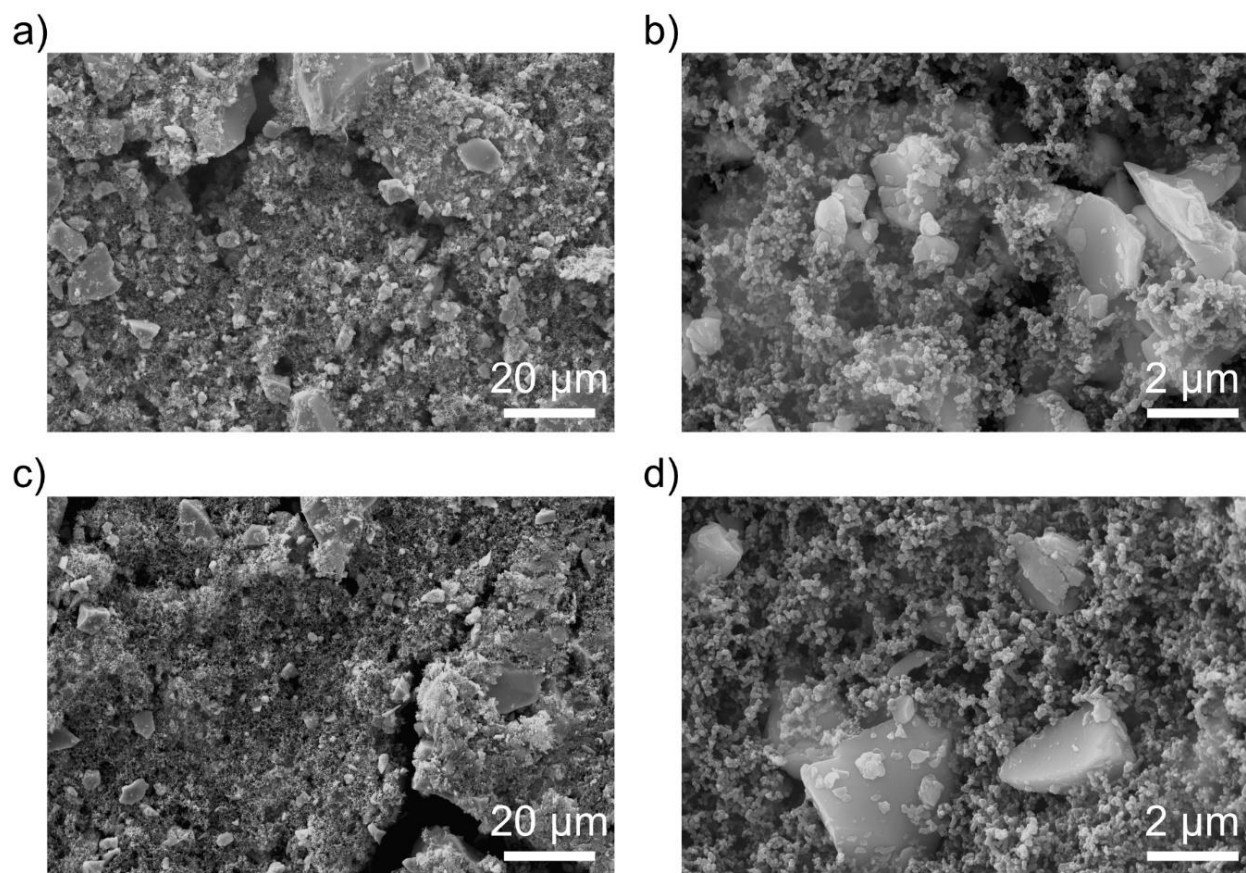

**Figure S1.** SEM images of the (a,b)  $\text{Ba}_8\text{Ge}_{43}$  and (c,d)  $\alpha\text{-Ge}$  electrodes prior to electrochemical cycling. The small, nanosized particles are the carbon black conducting additive used to improve electronic conductivity throughout the composite electrode.

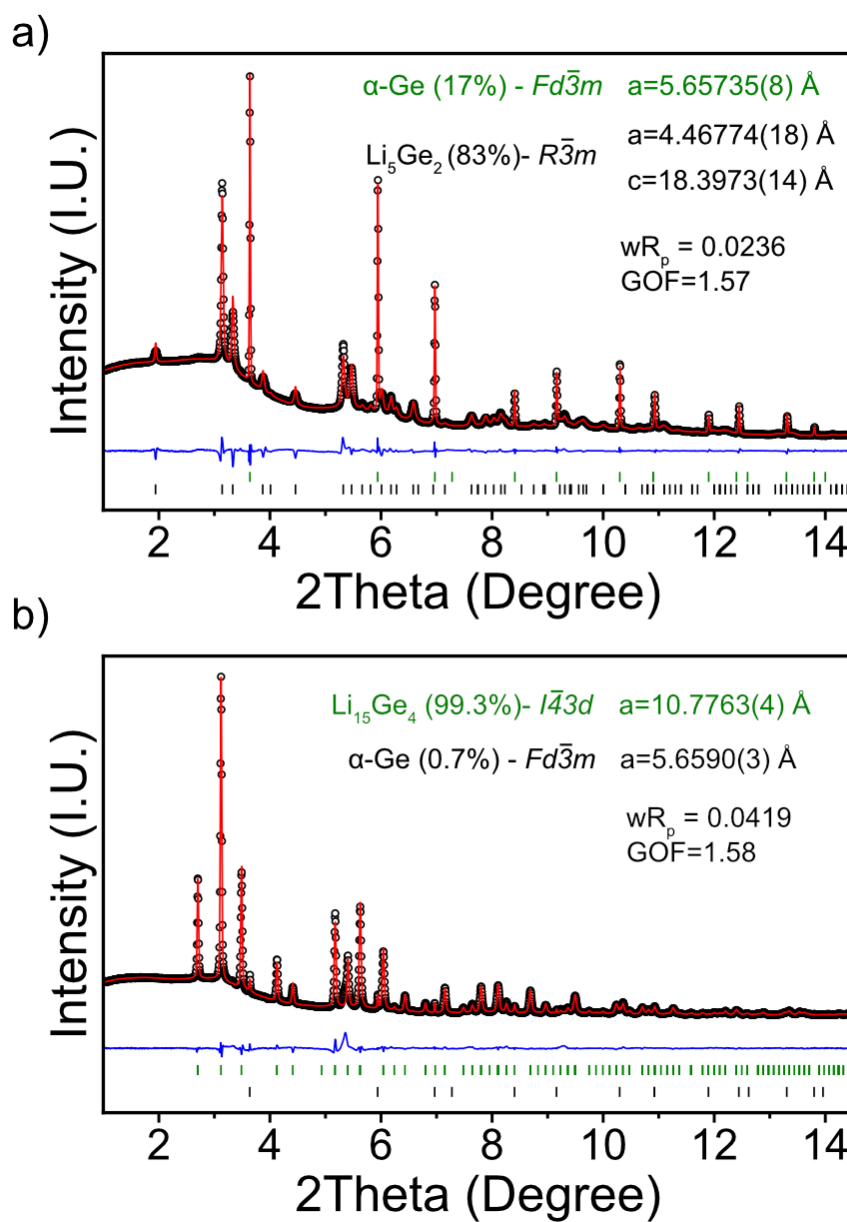

**Figure S2.** Rietveld refinements of the PXRD patterns of the (a)  $\text{Li}_{1.75}\text{Ge}$  and (b)  $\text{Li}_{3.75}\text{Ge}$  samples. The black circles represent the experimental pattern, the red curve represents the calculated pattern, and the blue curve represents the difference curve. The phase fractions are in mol%. The refined atomic positions, occupancies, and atomic displacement parameters can be found in **Table S2-3**.

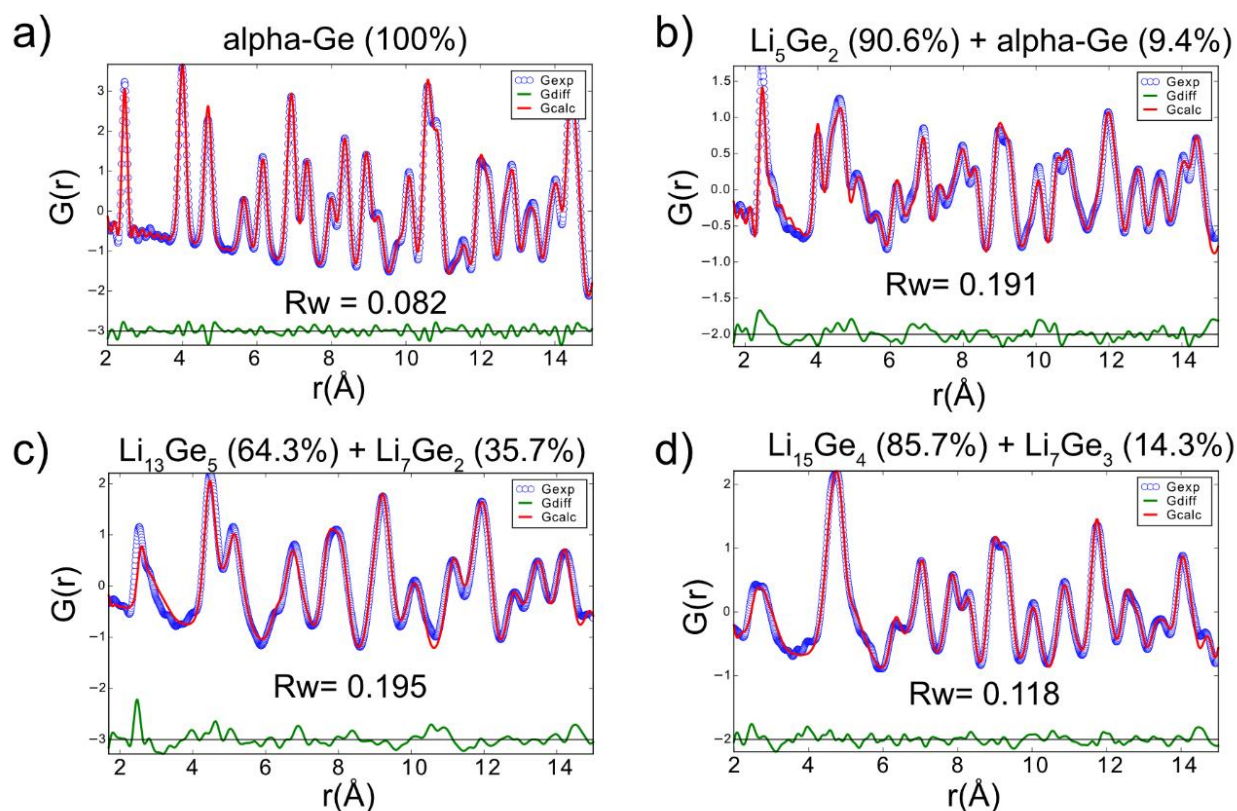

**Figure S3.** Refinements of the  $\alpha$ -Ge PDF patterns at compositions of (a) pristine  $\alpha$ -Ge (b)  $\text{Li}_{1.75}\text{Ge}$ , (c)  $\text{Li}_{2.75}\text{Ge}$  and (d)  $\text{Li}_{3.75}\text{Ge}$ . Phase amounts indicated in mol%. The sources for the reference structures are included in Section 1.4 of the Supporting Information.

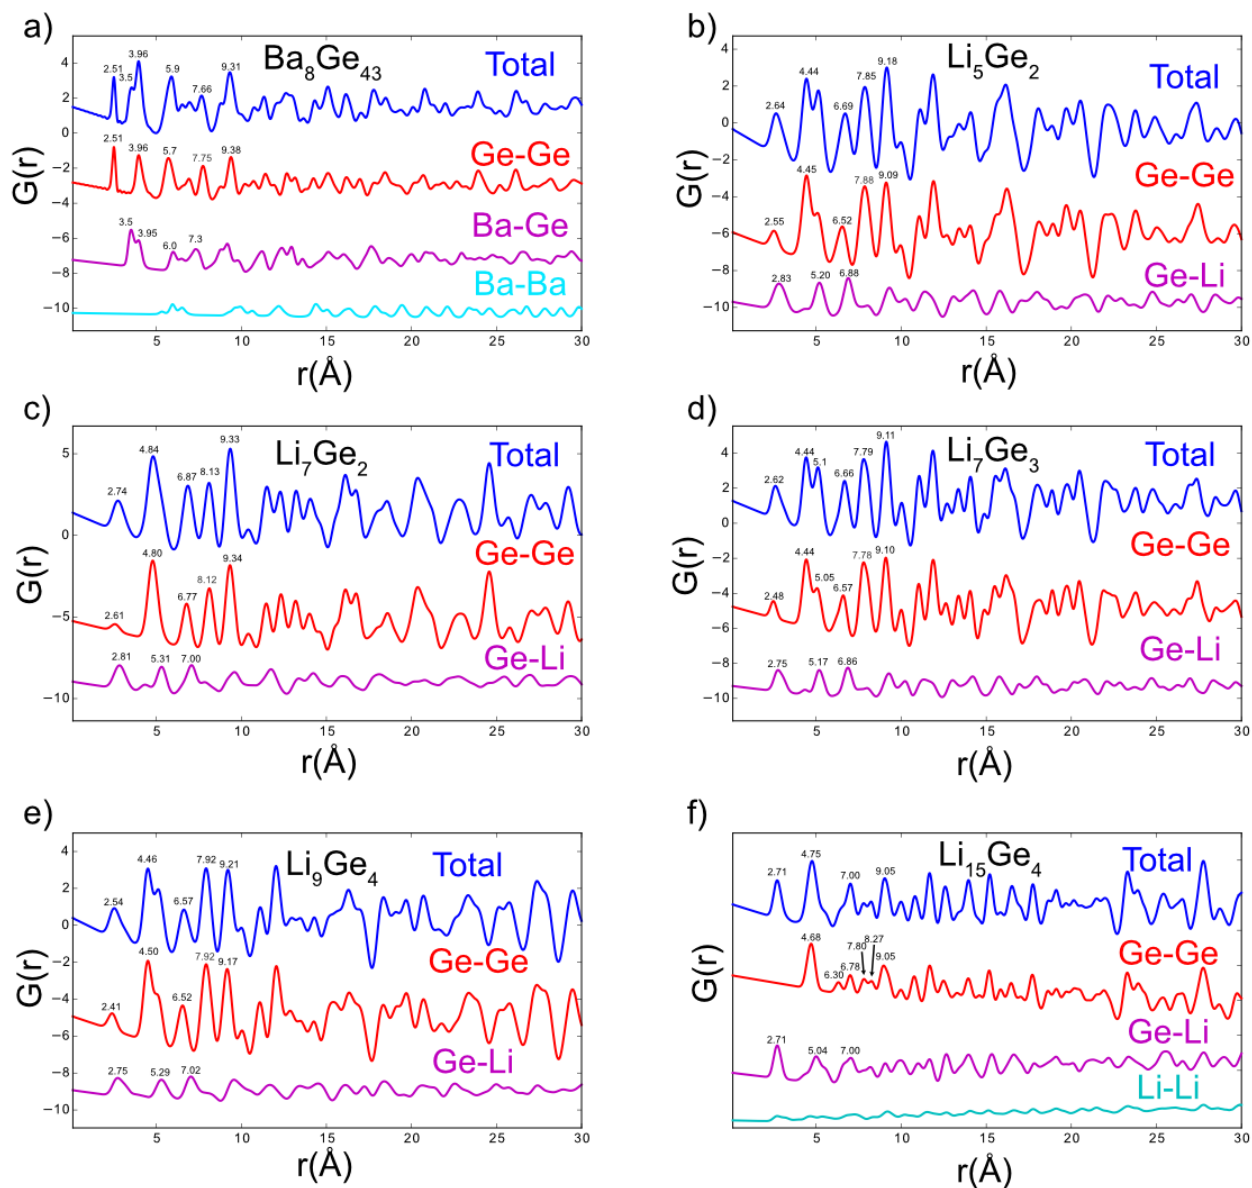

**Figure S4.** Calculated total and partial PDF patterns for (a)  $\text{Ba}_8\text{Ge}_{43}$ , (b)  $\text{Li}_5\text{Ge}_2$ , (c)  $\text{Li}_7\text{Ge}_2$ , (d)  $\text{Li}_7\text{Ge}_3$ , (e)  $\text{Li}_9\text{Ge}_4$ , and (f)  $\text{Li}_{15}\text{Ge}_4$ . The sources for the reference structures are included in Section 1.4 of the Supporting Information except for the structure of  $\text{Ba}_8\text{Ge}_{43}$ , which came from our previous study.<sup>1</sup>

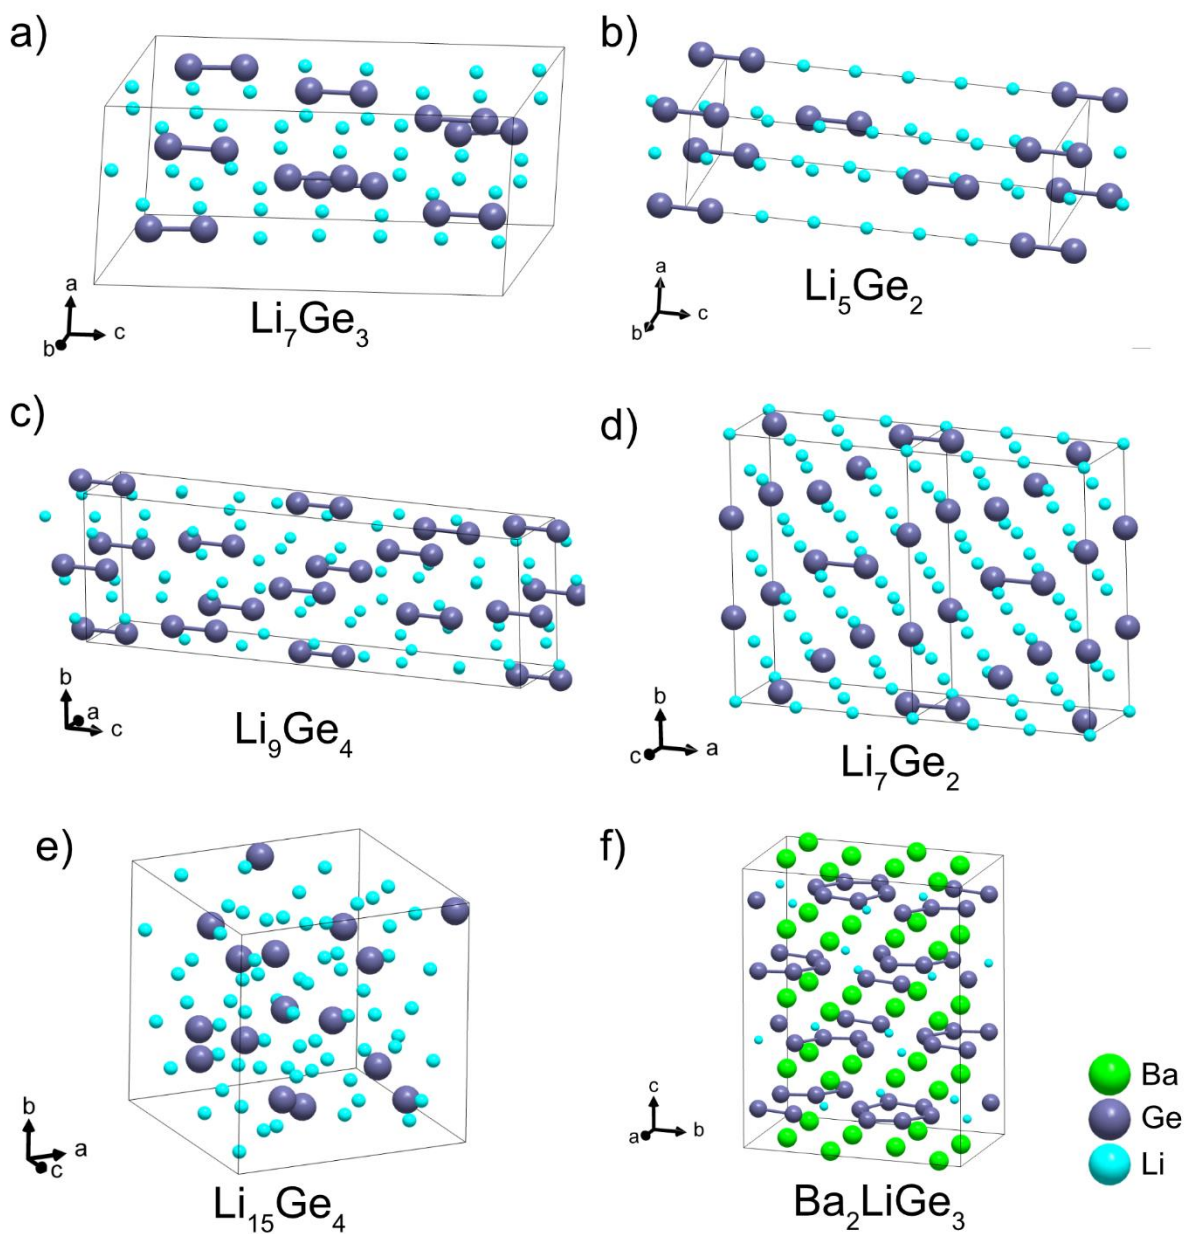

**Figure S5.** Crystal structures of (a)  $\text{Li}_7\text{Ge}_3$ , (b)  $\text{Li}_5\text{Ge}_2$ , (c)  $\text{Li}_9\text{Ge}_4$ , (d)  $\text{Li}_7\text{Ge}_2$ , (e)  $\text{Li}_{15}\text{Ge}_4$ , and (f)  $\text{Ba}_2\text{LiGe}_3$ . The sources for the reference structures are included in Section 1.4 and 1.5 of the Supporting Information.



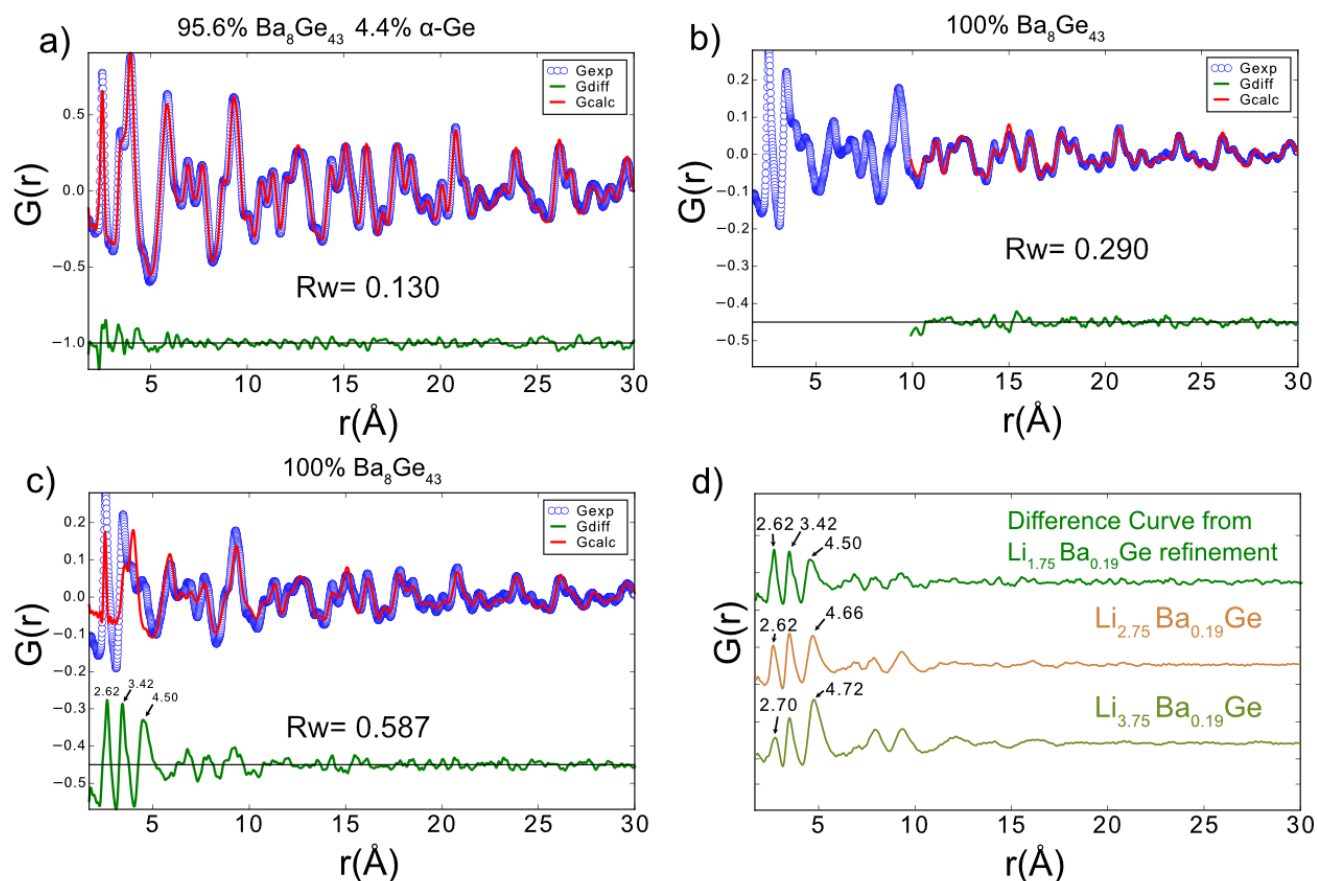

**Figure S6.** PDF refinements for (a) pristine  $\text{Ba}_8\text{Ge}_{43}$ , (b)  $\text{Ba}_8\text{Ge}_{43}$  after lithiation to a composition of  $\text{Li}_{1.75}\text{Ba}_{0.19}\text{Ge}$  and (c)  $\text{Li}_{1.75}\text{Ba}_{0.19}\text{Ge}$  (fit range restricted to 10 – 30  $\text{\AA}$ ). (d) Comparison of the amorphous phase from the difference curve of the refinement for  $\text{Li}_{1.75}\text{Ba}_{0.19}\text{Ge}$  in (c) with the PDFs of  $\text{Li}_{2.75}\text{Ba}_{0.19}\text{Ge}$  and  $\text{Li}_{3.75}\text{Ba}_{0.19}\text{Ge}$  (y-offset for clarity). The sources for the reference structures are included in Section 1.4 of the Supporting Information.

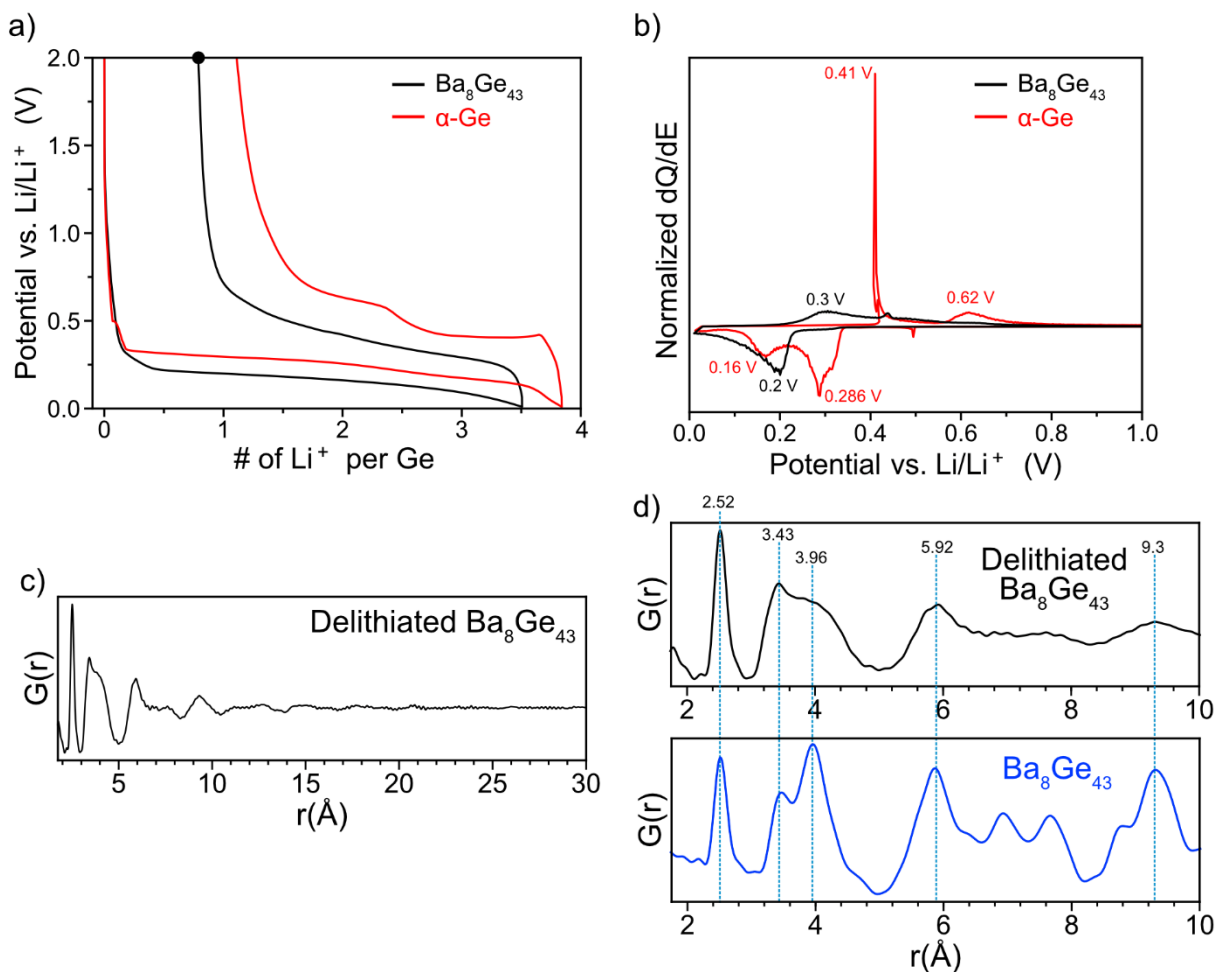

**Figure S7.** (a) Voltage profile of the lithiation and delithiation of  $\text{Ba}_8\text{Ge}_{43}$  and  $\alpha\text{-Ge}$  using 25 mA/g; the # of  $\text{Li}^+$  is referenced to the amount of Ge atoms in each compound. (b) Corresponding  $dQ/dE$  plot of the voltage profiles. (c) PDF plot of the  $\text{Ba}_8\text{Ge}_{43}$  after one full lithiation/delithiation cycle (“delithiated  $\text{Ba}_8\text{Ge}_{43}$ ”) taken from the point indicated by the black dot in the voltage profile in (a). (d) Comparison of PDFs from delithiated  $\text{Ba}_8\text{Ge}_{43}$  (amorphous) and the crystalline  $\text{Ba}_8\text{Ge}_{43}$ . The position of the peaks in the PDFs are similar, suggesting that the delithiated  $\text{Ba}_8\text{Ge}_{43}$  might have a similar local structure as the crystalline  $\text{Ba}_8\text{Ge}_{43}$ .

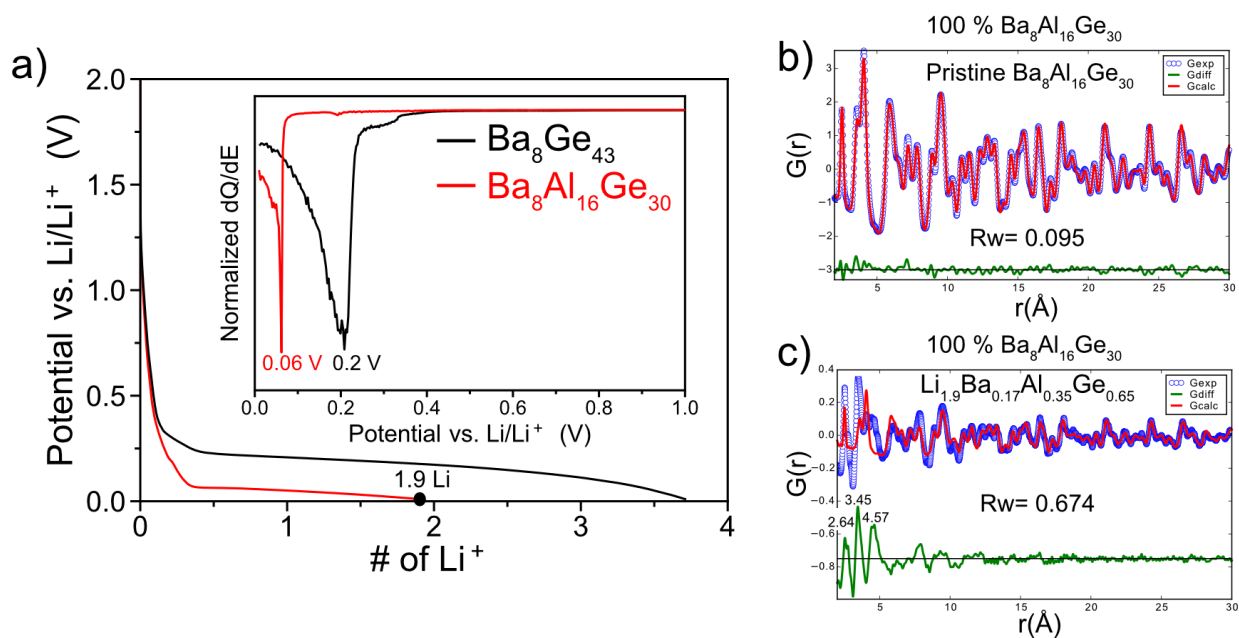

**Figure S8.** (a) Voltage profile and corresponding  $dQ/dE$  plot of the lithiation of  $\text{Ba}_8\text{Ge}_{43}$  and  $\text{Ba}_8\text{Al}_{16}\text{Ge}_{30}$  using 25 mA/g; the # of  $\text{Li}^+$  is referenced to the amount of (Al + Ge) atoms in each compound. (b) PDF refinement of the pristine  $\text{Ba}_8\text{Al}_{16}\text{Ge}_{30}$  clathrate, using structure from ref.<sup>1</sup> (c) PDF refinement of the lithiated  $\text{Ba}_8\text{Al}_{16}\text{Ge}_{30}$  ( $\text{Li}_{1.9}\text{Ba}_{0.17}\text{Al}_{0.35}\text{Ge}_{0.65}$ ) to the  $\text{Ba}_8\text{Al}_{16}\text{Ge}_{30}$  structure from ref.<sup>1</sup> The difference curve reveals the presence of an amorphous phase with similar correlation positions as those found in  $\text{Li}_{1.75}\text{Ba}_{0.19}\text{Ge}$  (Figure S6c).

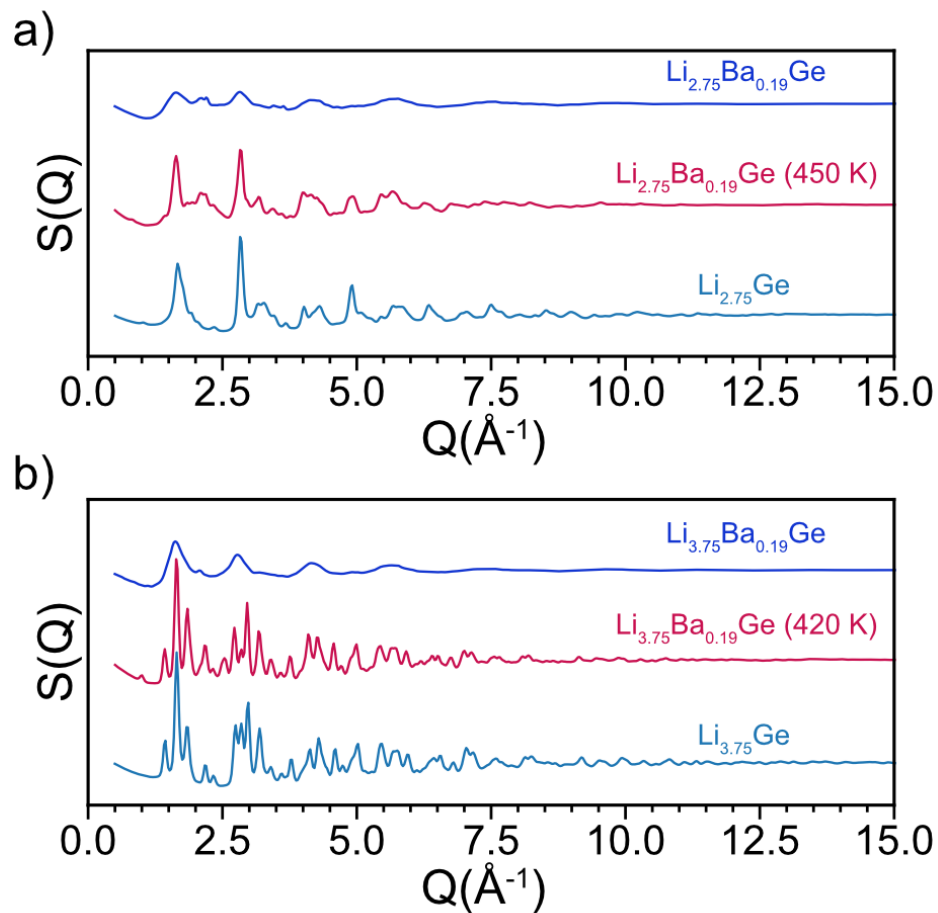

**Figure S9.** Comparison of total scattering structure function,  $S(Q)$ , with intensities normalized by the average scattering factors and corrected by a polynomial fit of (a)  $\text{Li}_{2.75}\text{Ba}_{0.19}\text{Ge}$ : unheated (blue), heated to 450 K (pink), and lithiated  $\alpha$ -Ge (light blue); (b)  $\text{Li}_{3.75}\text{Ba}_{0.19}\text{Ge}$ : unheated (blue), heated to 420 K (pink), and lithiated  $\alpha$ -Ge (light blue).

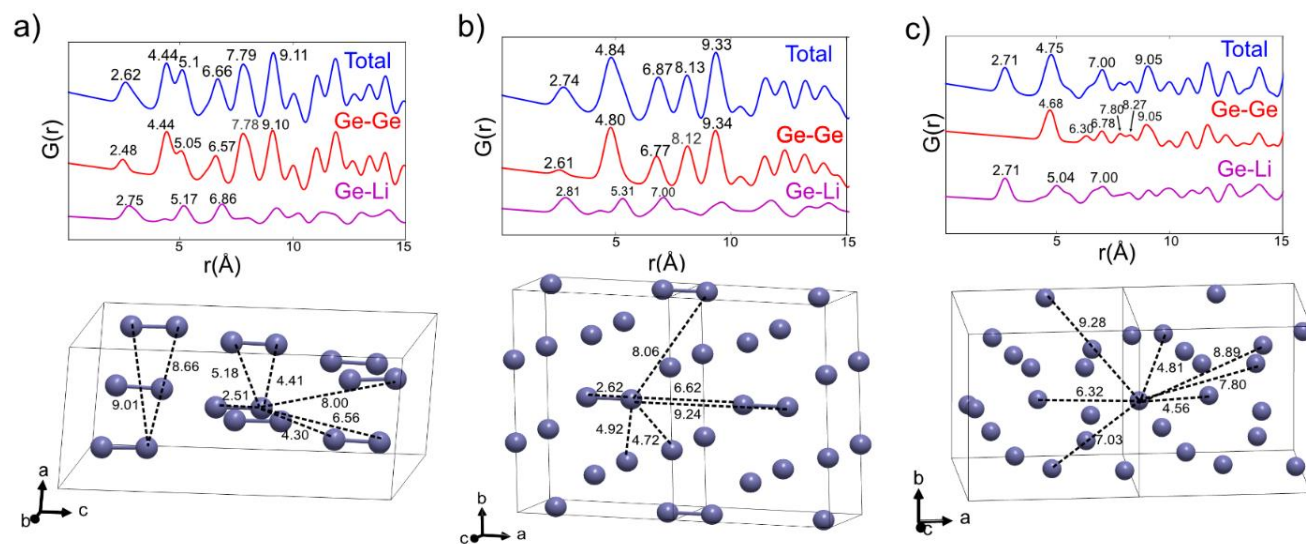

**Figure S10.** Assignment of Ge-Ge correlation distances found in the calculated PDF to distances between Ge atoms for (a)  $\text{Li}_7\text{Ge}_3$  (b)  $\text{Li}_7\text{Ge}_2$  and (c)  $\text{Li}_{15}\text{Ge}_4$ . Note that this is not an exhaustive assignment of the atomic correlations but serves to give an idea of the types of atom-atom distances corresponding to the correlations in the PDFs. The sources for the reference structures are included in Section 1.4 of the Supporting Information.

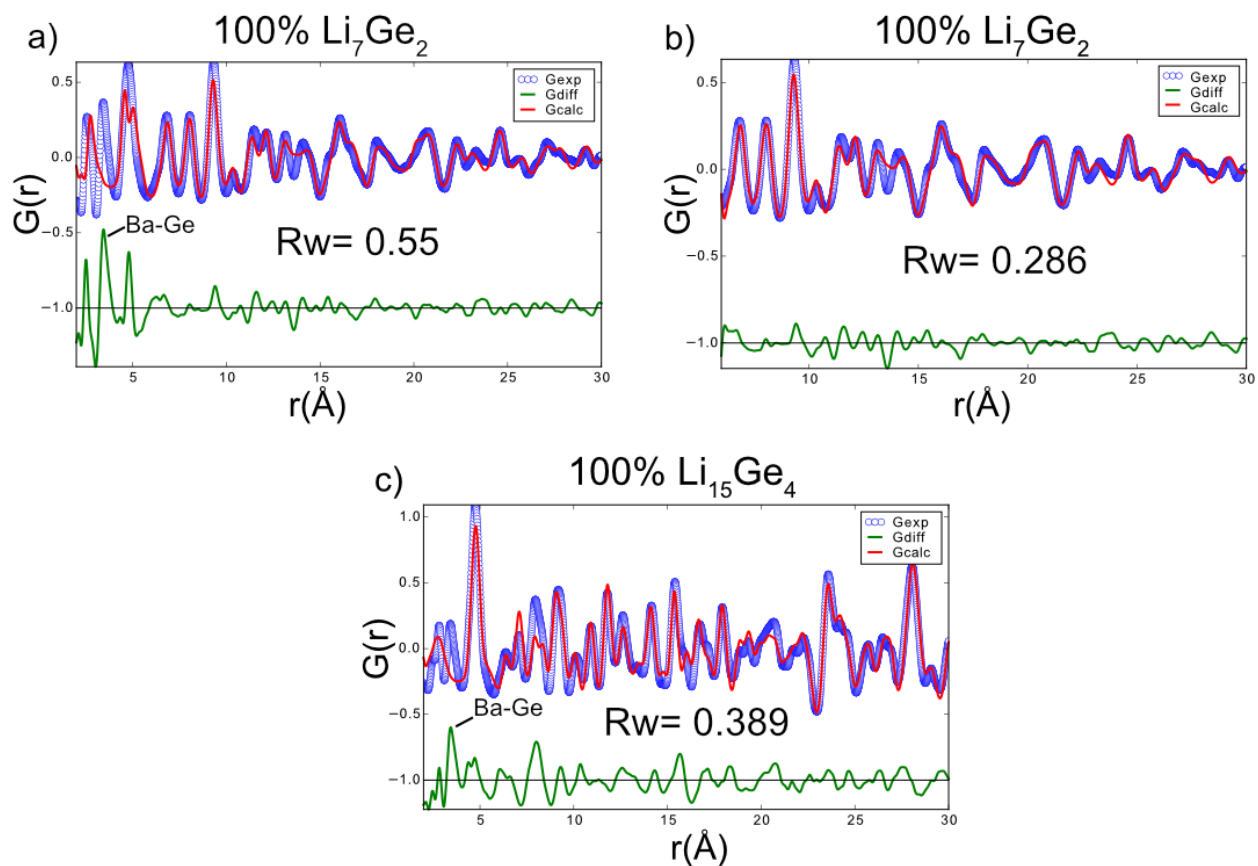

**Figure S11.** Refinements of the PDF from  $\text{Li}_{2.75}\text{Ba}_{0.19}\text{Ge}$  after heating to 450 K, fit to  $\text{Li}_7\text{Ge}_2$  (a) from 2 – 30  $\text{\AA}$ , and (b) from 6 – 30  $\text{\AA}$ . (c) Refinement of the PDF for  $\text{Li}_{3.75}\text{Ba}_{0.19}\text{Ge}$  heated to 420 K, fit to  $\text{Li}_{15}\text{Ge}_4$ . The sources for the reference structures are included in Section 1.4 of the Supporting Information.

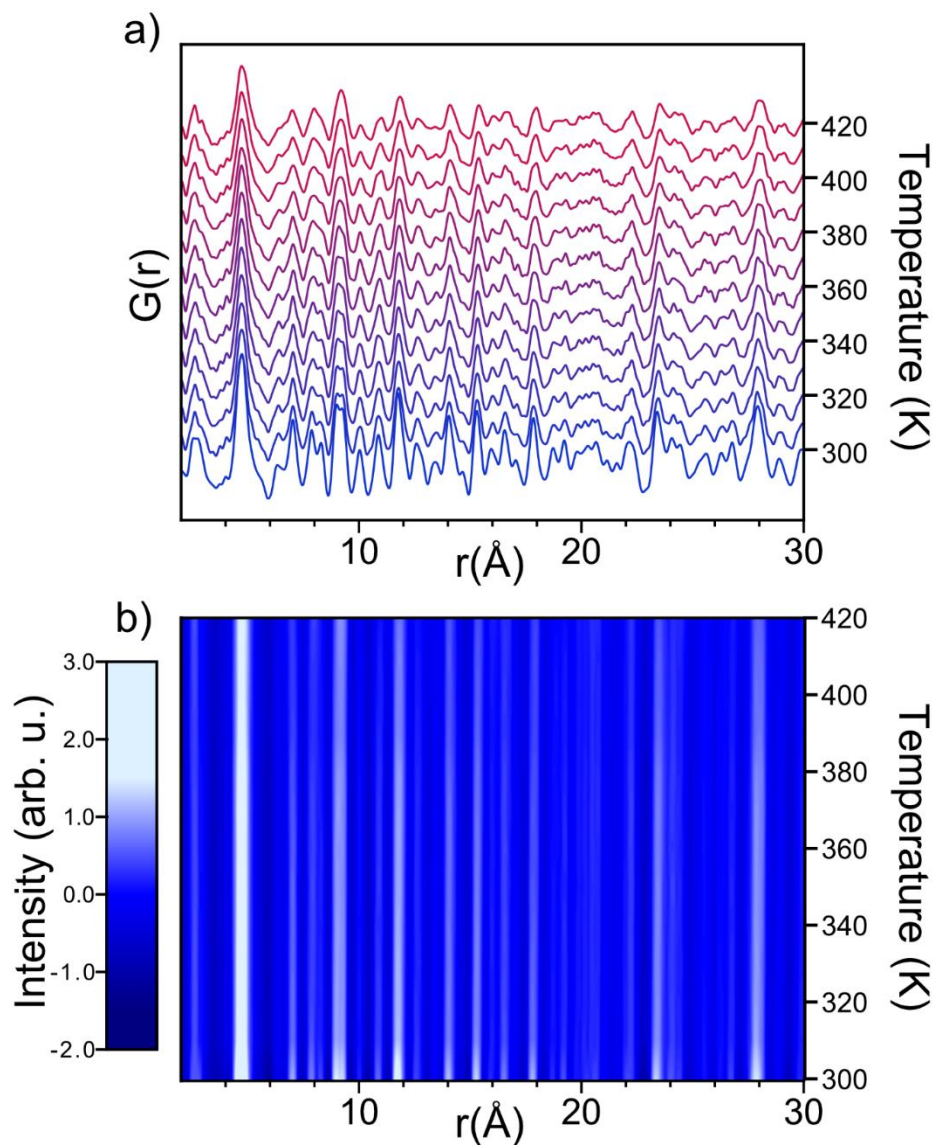

**Figure S12.** (a) Variable temperature PDFs during *in situ* heating from 310 – 420 K for fully lithiated  $\alpha$ -Ge ( $\text{Li}_{3.75}\text{Ge}$ ). Intervals of 10 K and 10 minute holds at each temperature were used. (b) Corresponding false colormaps of the PDF data; a linear interpolation was used between measured data points.



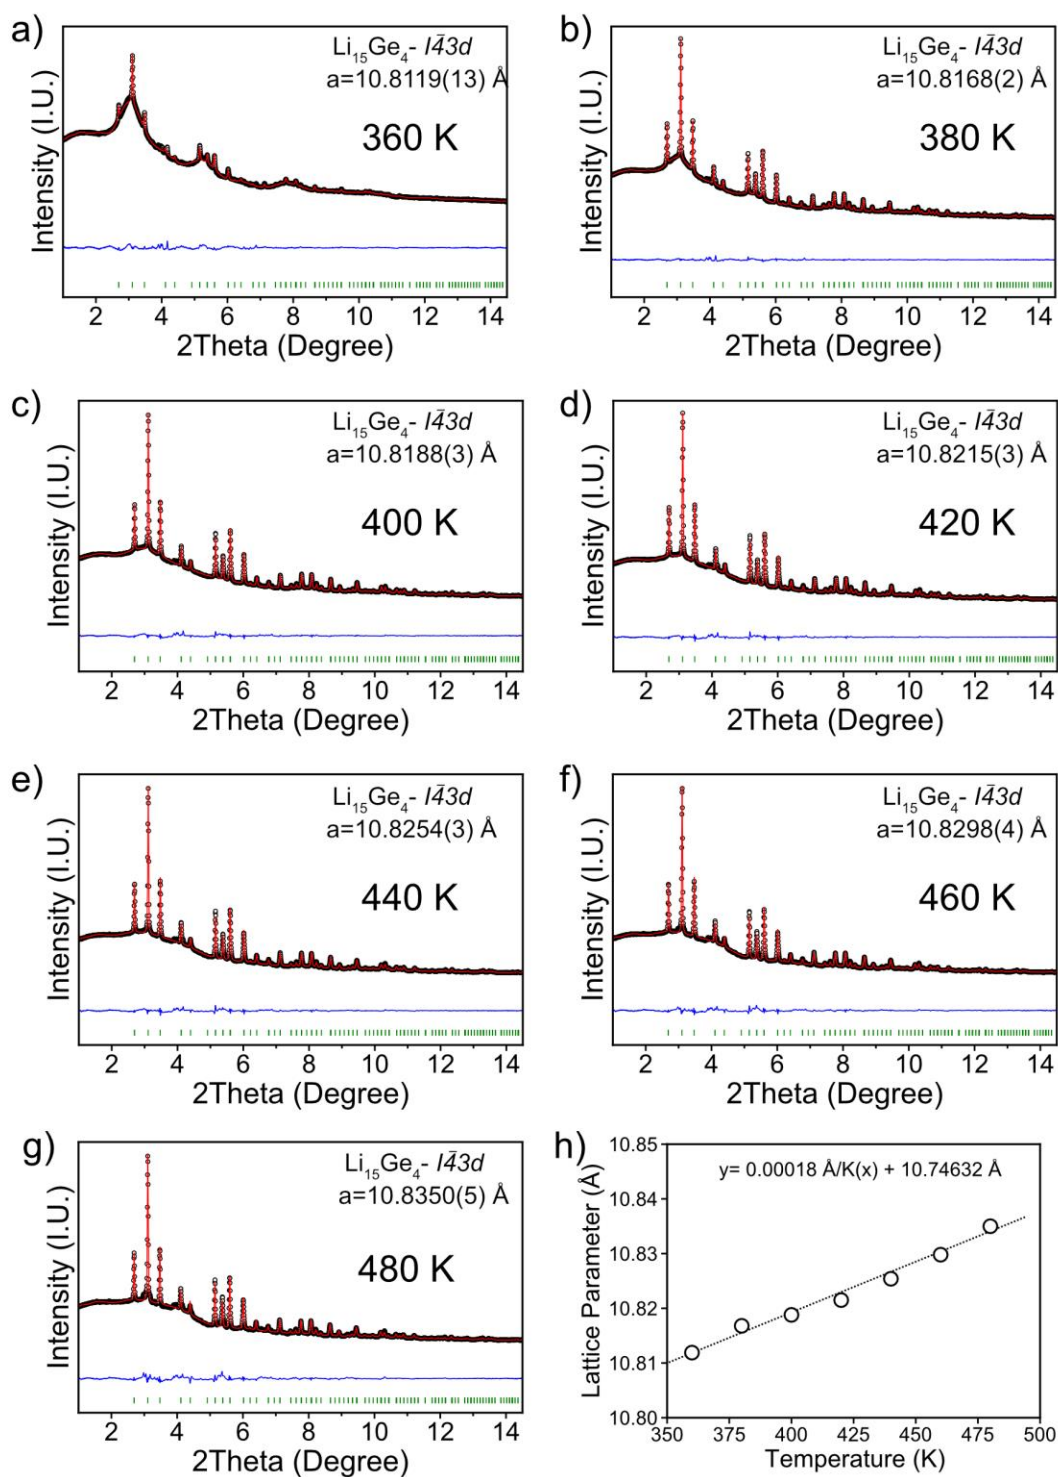

**Figure S13.** (a)-(g) Rietveld refinements of the XRD patterns obtained for  $\text{Li}_{3.75}\text{Ba}_{0.19}\text{Ge}$  during *in situ* heating from 360 – 480 K; patterns were fit to the  $\text{Li}_{15}\text{Ge}_4$  structural model; (h) Lattice parameter vs. temperature plot with a linear regression model.



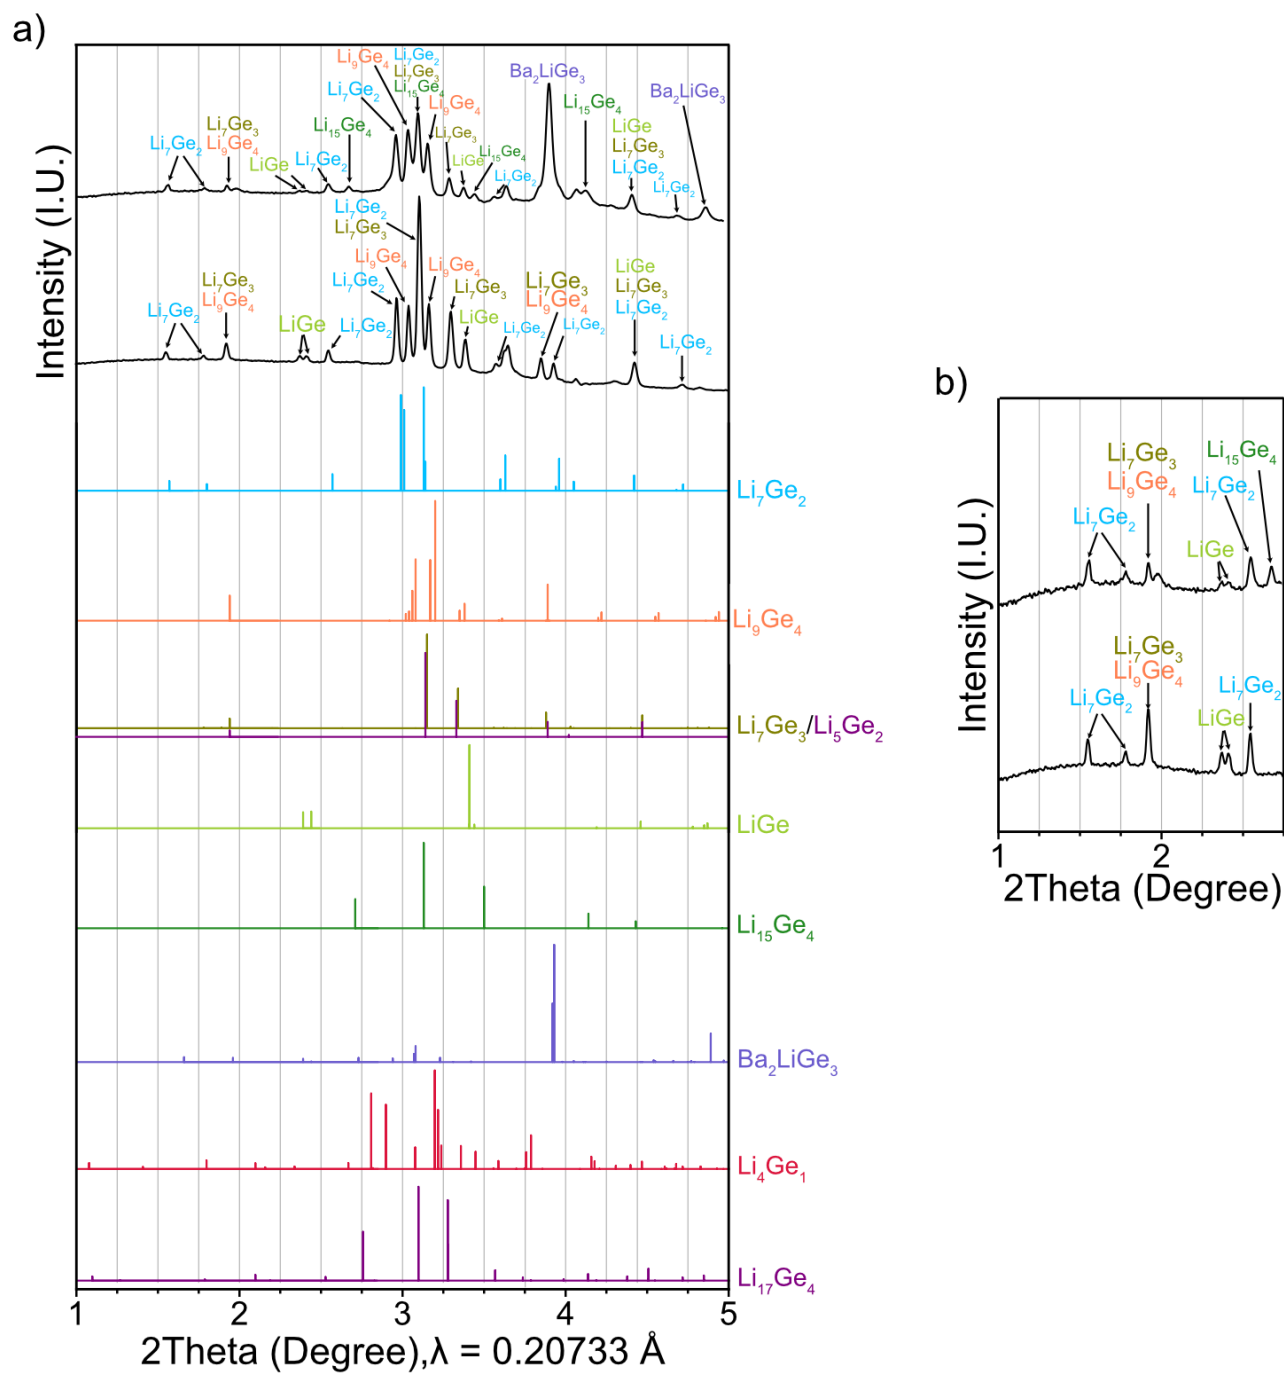

**Figure S14.** (a) XRD patterns of  $\text{Li}_{3.75}\text{Ba}_{0.19}\text{Ge}$  and  $\text{Li}_{3.75}\text{Ge}$  after heating to 480 K with the simulated XRD patterns of possible Li/Ge/Ba phases for identification. (b) Zoom in of the low angle peaks and their identification. The sources for the reference structures are included in Section 1.4 and 1.5 of the Supporting Information.

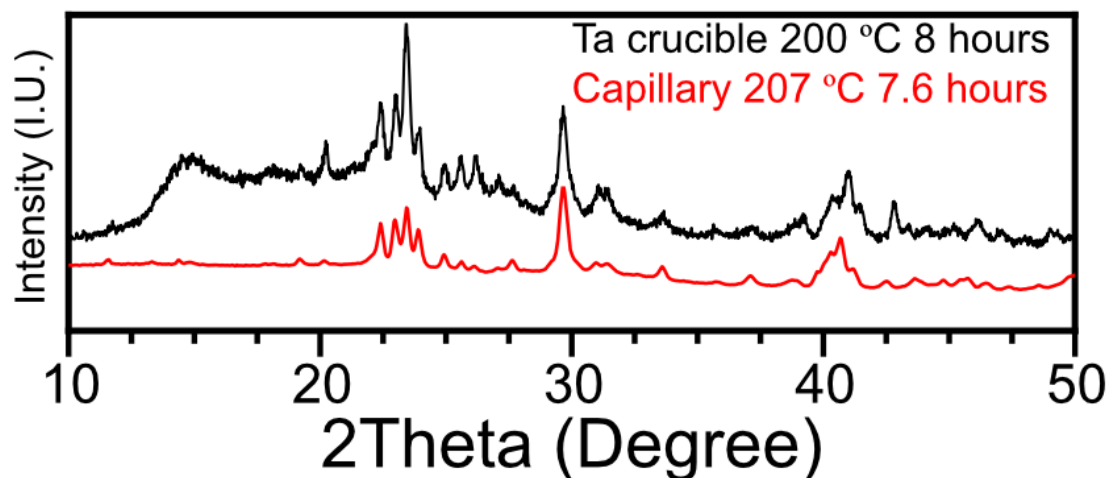

**Figure S15.** *Ex situ* laboratory powder XRD pattern of  $\text{Li}_{3.75}\text{Ba}_{0.19}\text{Ge}$  after heating at  $200\text{ }^{\circ}\text{C}$  for 8 hours under argon in a Ta boat (red) compared to the synchrotron *in situ* XRD heating pattern taken from  $\text{Li}_{3.75}\text{Ba}_{0.19}\text{Ge}$  after heating at  $480\text{ K}$  for 6.6 hours in a borosilicate capillary (black). Note that the XRD pattern for the sample heated in the Ta boat was taken at room temperature while the XRD pattern from the capillary was taken at  $480\text{ K}$  ( $207\text{ }^{\circ}\text{C}$ ). The background from  $15 < 2\theta < 25$  in the black trace is from the Kapton film that was used to protect the sample from oxidation during the measurement. The similarity in the XRD patterns suggests that the use of the glass capillary in the synchrotron measurements did not have any effect on the formation of the reaction products.

## Supporting Information References

- (1) Dopilka, A.; Zhao, R.; Weller, J. M.; Bobev, S.; Peng, X.; Chan, C. K. Experimental and Computational Study of the Lithiation of  $\text{Ba}_8\text{Al}_y\text{Ge}_{46-y}$  Based Type I Germanium Clathrates. *ACS Appl. Mater. Interfaces* **2018**, *10*, 37981–37993.
- (2) Juhás, P.; Davis, T.; Farrow, C. L.; Billinge, S. J. L. PDFgetX3: A Rapid and Highly Automatable Program for Processing Powder Diffraction Data into Total Scattering Pair Distribution Functions. *J. Appl. Crystallogr.* **2013**, *46*, 560–566.
- (3) Yang, X.; Juhas, P.; Farrow, C. L.; Billinge, S. J. L. xPDFsuite: An End-to-End Software Solution for High Throughput Pair Distribution Function Transformation, Visualization and Analysis. arXiv:1402.3163 [cond-mat], **2014**.
- (4) Farrow, C. L.; Juhas, P.; Liu, J. W.; Bryndin, D.; Boin, E. S.; Bloch, J.; Proffen, T.; Billinge, S. J. L. PDFfit2 and PDFgui: Computer Programs for Studying Nanostructure in Crystals. *J. Phys. Condens. Matter* **2007**, *19*, 335219.
- (5) Borkiewicz, O. J.; Shyam, B.; Wiaderek, K. M.; Kurtz, C.; Chupas, P. J.; Chapman, K. W. The AMPIX Electrochemical Cell: A Versatile Apparatus for in Situ X-Ray Scattering and Spectroscopic Measurements. *J. Appl. Crystallogr.* **2012**, *45*, 1261–1269.
- (6) Osman, H. H.; Bobev, S. Synthesis, Structural Characterization and Chemical Bonding of  $\text{Sr}_7\text{Li}_6\text{Sn}_{12}$  and Its Quaternary Derivatives with Eu and Alkaline Earth Metal (Mg, Ca, Ba) Substitutions. A Tale of Seven Li-Containing Stannides and Two Complex Crystal Structures. *Eur. J. Inorg. Chem.* **2020**, 1979–1988.
- (7) Fukuoka, H.; Kiyoto, J.; Yamanaka, S. Superconductivity and Crystal Structure of the Solid Solutions of  $\text{Ba}_{8-8x}\text{Si}_{146-x}\text{Ge}_x$  ( $0 \leq x \leq 23$ ) with Type I Clathrate Structure. *J. Solid State Chem.* **2003**, *175*, 237–244.
- (8) Smakula, A.; Kalnajs, J. Precision Determination of Lattice Constants with a Geiger-Counter X-Ray Diffractometer. *Phys. Rev.* **1955**, *99*, 1737.
- (9) Hopf, V.; Müller, W.; Schäfer, H. Die Kristallstruktur Der Phase  $\text{Li}_9\text{Ge}_4$ . *Zeitschrift für Naturforsch.* **1970**, *25b*, 653.

- (10) Hopf, V.; Müller, W.; Schäfer, H. Die Struktur Der Phase  $\text{Li}_7\text{Ge}_2$ . *Zeitschrift für Naturforsch.* **1972**, *27b*, 1157–1160.
- (11) Johnson, Q.; Smith, G.S.; Wood, D.W. The Crystal Structure of  $\text{Li}_{15}\text{Ge}_4$ . *Acta Crystallogr.* **1965**, *18*, 131–132.
- (12) Morris, A. J.; Grey, C. P.; Pickard, C. J. Thermodynamically Stable Lithium Silicides and Germanides from Density Functional Theory Calculations. *Phys. Rev. B - Condens. Matter Mater. Phys.* **2014**, *90*, 22–24.
- (13) Petráček, V.; Dušek, M.; Palatinus, L. Crystallographic Computing System JANA2006: General Features. *Zeitschrift für Kristallographie* **2014**, *229*, 345–352.
- (14) Menges, E.; Hopf, V.; Schäfer, H.; Weiss, A. Die Kristallstruktur von  $\text{LiGe}$  — Ein Neuartiger, Dreidimensionaler Verband von Element(IV)-Atomen. *Zeitschrift für Naturforschung B* **1969**, *24*, 1351–1352.
- (15) von Schnering, H. G.; Bolle, U.; Curda, J.; Peters, K.; Carrillo-Cabrera, W.; Somer, M.; Schultheiss, M.; Wedig, U. Hückel Arenes with Ten  $\pi$  Electrons: Cyclic Zintl Anions  $\text{Si}_6^{10-}$  and  $\text{Ge}_6^{10-}$  Isosteric to  $\text{P}_6^{4-}$  and  $\text{As}_6^{4-}$ . *Angew. Chem. Int. Ed.* **1996**, *35*, 984–986.
- (16) Zeilinger, M.; Fässler, T. F. Structural and Thermodynamic Similarities of Phases in the  $\text{Li-Tt}$  ( $\text{Tt} = \text{Si, Ge}$ ) Systems: Redetermination of the Lithium-Rich Side of the  $\text{Li-Ge}$  Phase Diagram and Crystal Structures of  $\text{Li}_{17}\text{Si}_{4.0-x}\text{Ge}_x$  for  $x = 2.3, 3.1, 3.5$ , and 4 as Well as  $\text{Li}_{4.1}\text{Ge}$ . *J. Chem. Soc. Dalt. Trans.* **2014**, *43*, 14959–14970.
